# Supplementary material for: Evidence-based practice, research utilization, and knowledge translation in chiropractic: a scoping review
Source: Springer Nature journal article supplement (doi:10.1186/s12906-016-1175-0), 2016-07-13
Supplement: MOESM1 [file 10493542]

Research utilization, evidence-based practice and knowledge translation in chiropractic: A scoping review.

**Supplementary file 1:** MEDLINE search strategy used to identify research articles.

- 1 exp Clinical Competence/ or exp Information Dissemination/ or exp "Diffusion of Innovation"/ or exp Health Knowledge, Attitudes, Practice/ or organizational innovation/ or knowledge management/
- 2 exp Evidence-Based Practice/ or "evidence-based practice".ti,ab.
- 3 Practice Guidelines as Topic/ or exp Guideline Adherence/
- 4 Professional Practice/ or exp Physician's Practice Patterns/ or practice pattern\*.mp.
- 5 Quality improvement.mp. or Quality Improvement/
- 6 (organi\*ational adj3 innovation).ti,ab.
- 7 (complex adj3 intervention).ti,ab.
- 8 (scholarship adj3 practice).ti,ab.
- 9 (practice adj3 development).ti,ab.
- 10 (evidence-informed adj (healthcare or health care or decision making)).ti,ab.
- 11 (guideline\* adj2 (introduc\* or issu\* or impact\* or effect\* or distribut\* or adher\* or compliance\* or utili\*ation or "use" or uptake or diffusion or transfer\* or implement\* or translat\* or disseminat\* or adopt\*)).ti,ab.
- 12 ((research or knowledge or evidence) adj2 (uptake or "use" or diffusion or disseminat\* or utili\*ation or transfer\* or translat\* or implement\* or adoption)).ti,ab.
- 13 "research into practice".ti,ab.
- 14 "evidence into practice".ti,ab.
- 15 "knowledge to action".ti,ab.
- 16 "know do gap".ti,ab.
- 17 (knowledge adj (mobilization or exchange)).ti,ab.
- 18 (belief\* or attitude\*).ti.
- 19 (benchmark\* or bench mark\*).ti,ab.
- 20 benchmarking/
- 21 1 or 2 or 3 or 4 or 5 or 6 or 7 or 8 or 9 or 10 or 11 or 12 or 13 or 14 or 15 or 16 or 17 or 18 or 19 or 20
- 22 Manipulation, Chiropractic/ or Chiropractic/
- 23 chiropract\*.tw.
- 24 chiroprax\*.tw.
- 25 spinal manipulative therap\*.mp. or spinal manipulation.tw.
- 26 Manipulation, Spinal/
- 27 22 or 23 or 24 or 25 or 26
- 28 21 and 27
